# Supplementary material
Source: PubMed Central journal article supplement (PMC2941990)
Supplement: NIHMS229237-supplement-1.pdf [file NIHMS229237-supplement-1.pdf]

## SUPPLEMENTAL MATERIAL

*Plasmid cDNAs:* All GIT1 constructs were described previously,<sup>1</sup> including GFP- GIT1(WT), Flag-GIT1(WT) and Xpress-GIT1(WT). Briefly, the full-length mGIT1 was cloned into either Flag-tagged, Xpress-tagged or GFP-tagged vector and resulted in Flag-GIT1(WT), Xpress-GIT1(WT) or GFP-GIT1(WT).<sup>2</sup> All GIT1 mutants including Flag-GIT1(Y293F), Flag-GIT1(Y392F), Xpress-GIT1(Y321F), GFP-GIT1(Y293A) and GFP-GIT1(Y392A) were created by using QuikChange site-directed mutagenesis kits. The sequence and reading frame of GIT1 mutants were confirmed by sequencing analysis.

*Cell Culture:* A7r5 rat smooth muscle cells (A7r5 SMC) were purchased from ATCC. A7r5 SMC and HEK 293 cells were grown in 5% CO<sub>2</sub> at 37°C in Dulbecco's modified Eagle's medium supplemented with 10% fetal bovine serum, penicillin, and streptomycin (Invitrogen). SYF<sup>-/-</sup>, SYF<sup>+/+</sup> fibroblast cell lines derived from src<sup>-/-</sup> yes<sup>-/-</sup> fyn<sup>-/-</sup>, src<sup>+/+</sup> yes<sup>-/-</sup> fyn<sup>-/-</sup> mouse embryos respectively, were a generous gift from Jonathan A. Cooper (University of Washington) and cultured in DMEM supplemented with 10% fetal bovine serum and 500 µg/ml G418.

*Transient transfection siRNA or cDNA and Infection with adenovirus:* For siRNA transfection, A7r5 SMC were transiently transfected with 100 nM control siRNA or GIT1 siRNA with Lipofectamine 2000 reagent in OptiMEM medium at 90% confluence. Rat GIT1 siRNA (AAGCTGCCAAGAAGAAGCTAC) and control non-silencing siRNA (AATTCTCCGACACGTGTCCT) were described previously<sup>3</sup> and ordered from Ambion. After 6 hours, medium was replaced by a complete DMEM medium with 10% serum. For plasmid transfection, HEK293 cells were transfected with LipofectAMINE/plus, and A7r5 cells

were transfected with Lipofectamine 2000 in OptiMEM medium at 90% confluence described previously.<sup>3</sup> After 6 hours, the medium was replaced by a complete medium with 10% serum. For virus infection, cells were infected with 100MOI adenovirus, after 48 hours cells were treated and fixed for immunostaining or harvested for western blot analysis.

*Cell lysate preparation:* Cells were rinsed with ice-cold phosphate-buffered saline (PBS; 150mM NaCl, 20mM Na<sub>2</sub>PO<sub>4</sub>, pH 7.4) twice on ice and harvested in lysis buffer (150mM NaCl, 1mM EDTA, 1mM EGTA, 1% Triton X-100, 2.5mM sodium pyrophosphate, 5mM NaF, 1mM Na<sub>3</sub>VO<sub>4</sub> plus 1:1000 protein inhibitor cocktail) and centrifuged at 10,000rpm for 10 minutes. The protein concentration was determined by the Bradford assay.

*Immunoprecipitation and immunoblotting:* For immunoprecipitation, 1µg of the indicated antibody, including PLCγ (BD Bioscience), FlagM2<sup>4</sup>, and Xpress (Invitrogen), was added to 500µg cell lysates and incubated overnight at 4°C. On the second day, 30 µl protein A/G-agarose beads (Life Technologies, Inc) were added and the incubation continued for 1 hour at 4°C. Following two washes with cell lysis, the immunoprecipitates were subjected to western blot analysis. For immunoblots, cell lysates were separated by SDS-PAGE electrophoresis, transferred to nitrocellulose membranes, and incubated with appropriate primary antibodies including GIT1 (Santa Cruz, 1:1000), Actin (Santa Cruz, 1:3000), PLCγ (BD Bioscience, 1:1000), FlagM2 (Sigma, 1:3000), Xpress (Invitrogen, 1:1000), pPLCγ (Y783) (Cell signaling, 1:1000), and 4G10 (upstate, 1:1000). After the membranes were washed for 3 times, the membranes were incubated with fluorescence-conjugated secondary antibodies (Molecular

Probe, 1:10000) for 1 hour, then immunoreactive proteins were visualized by an Odyssey infrared imaging system (LI-COR Biotechnology).

*Statistical Analysis:* All values are expressed as mean  $\pm$  SD of three independent experiments performed in triplicate. Data analysis was done by Student's t test. A  $p < 0.05$  was considered statistically significant.

## REFERENCES

1. Haendeler J, Yin G, Hojo Y, Saito Y, Melaragno M, Yan C, Sharma VK, Heller M, Aebbersold R, Berk BC. GIT1 mediates Src-dependent activation of phospholipase C $\gamma$  by angiotensin II and epidermal growth factor. *J Biol Chem.* 2003;278:49936-49944.
2. Yin G, Haendeler J, Yan C, Berk BC. GIT1 functions as a scaffold for MEK1-extracellular signal-regulated kinase 1 and 2 activation by angiotensin II and epidermal growth factor. *Mol Cell Biol.* 2004;24:875-885.
3. Pang J, Yan C, Natarajan K, Cavet ME, Massett MP, Yin G, Berk BC. GIT1 mediates HDAC5 activation by angiotensin II in vascular smooth muscle cells. *Arterioscler Thromb Vasc Biol.* 2008;28:892-898.
4. Hai CM, Hahne P, Harrington EO, Gimona M. Conventional protein kinase C mediates phorbol-dibutyrate-induced cytoskeletal remodeling in a7r5 smooth muscle cells. *Exp Cell Res.* 2002;280:64-74.
5. Linder S, Aepfelbacher M. Podosomes: adhesion hot-spots of invasive cells. *Trends Cell Biol.* 2003;13:376-385.

**Supplemental Figure I**

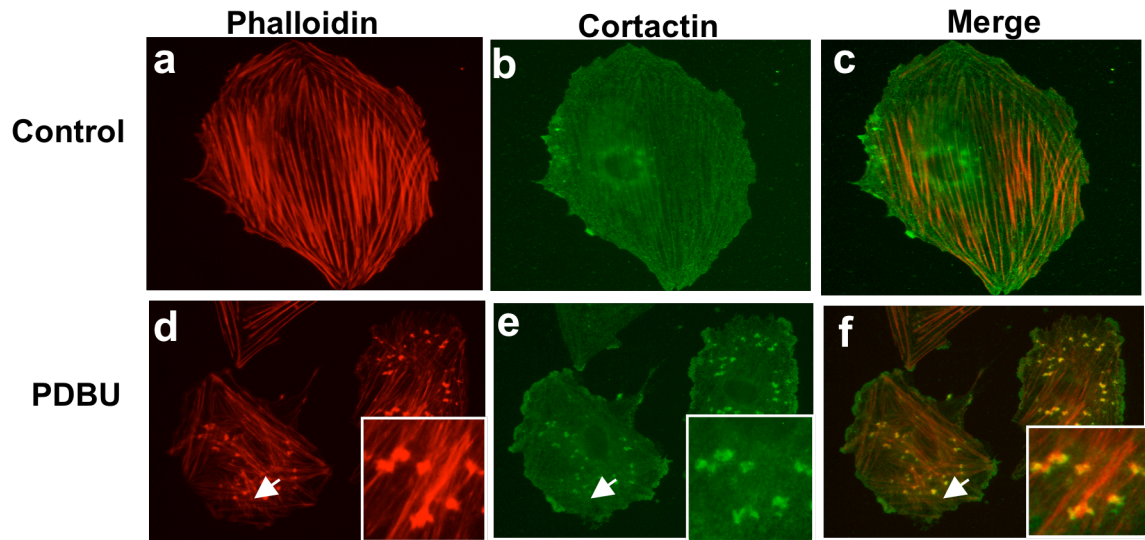

Supplemental Figure I. Representative immunofluorescent images showing F-actin (Phalloidin) and cortactin localization in podosomes. A7r5 cells were starved for 6 hours and then treated with or without 1 $\mu$ M PDBU for 60 min. Cells were fixed and double-stained for either cortactin or TRITC-Phalloidin. F-actin is in red. Cortactin is in green. Merged images are shown in panel c and f. Arrows indicate podosomes. Insets are enlarged images of podosome-enriched areas.

## Supplemental Figure II

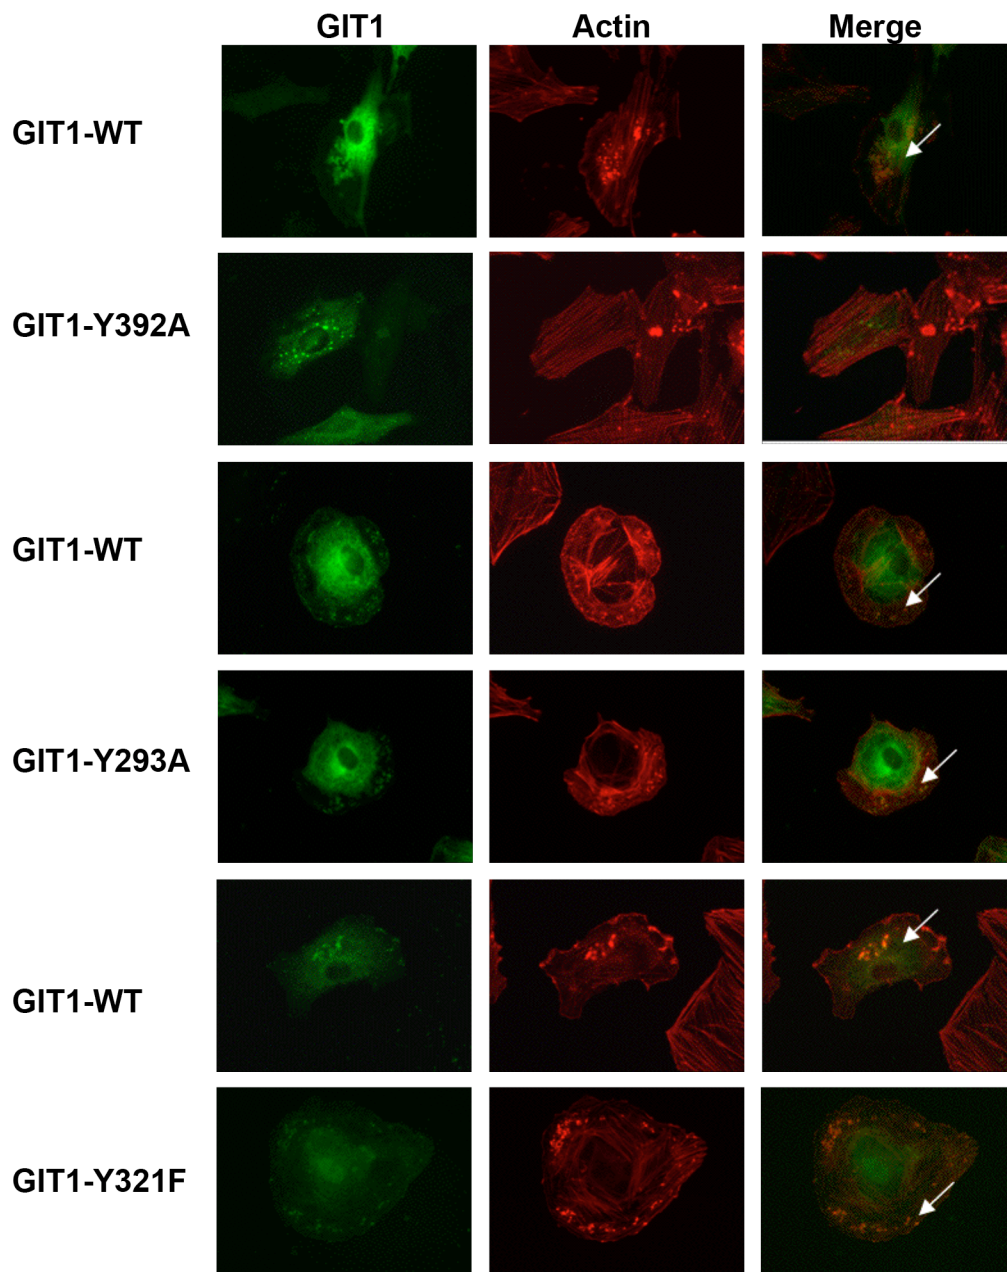

Supplemental Figure II. Ability of specific GIT1 mutants to form podosomes. A7r5 cells were transfected with GFP-GIT1 mutants- GIT1(WT), GIT1(Y293A) and GIT1(Y321F), **GIT1**( Y392A) and stimulated with PDBU for 60 minutes. Cells were then stained with phalloidin to detect F-actin. Merged images were used to assess co-localization of GIT1 mutants with podosomes. Arrows indicate podosome positive structures.

Supplemental Figure III

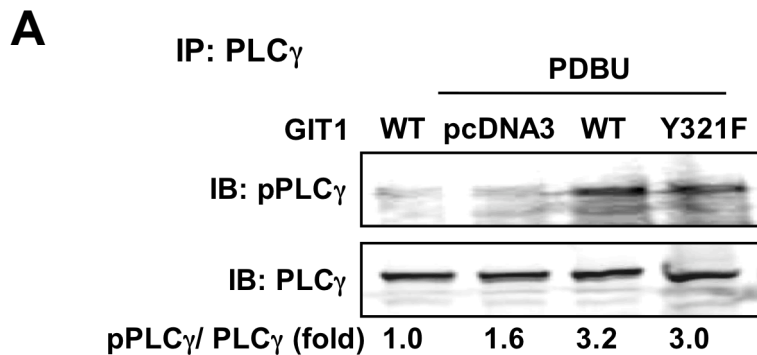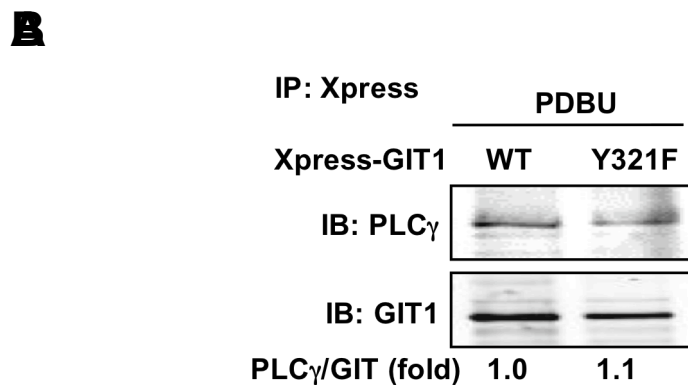

Supplemental Figure III: (A) HEK 293 were co-transfected with PLC $\gamma$  and pcDNA3 vector or Xpress-GIT1 (WT) or Xpress-GIT1 (Y321F) for 24 hours and then starved for 6 hrs. Cells were treated with 1  $\mu$ M PDBU for 10 min. Cell lysates were immunoprecipitated with PLC $\gamma$  antibody and immunoblotted with pPLC $\gamma$  antibody. Blot was reprobbed with PLC $\gamma$  antibody (lower panel). (B) Immunoprecipitation was performed with Xpress antibody and blot was probed for PLC $\gamma$ . Blot was reprobbed for GIT1. Fold changes with respect to control are indicated.

### Supplemental Figure IV

|                                     |                                                |                                                                  |                                               |
|-------------------------------------|------------------------------------------------|------------------------------------------------------------------|-----------------------------------------------|
| <b>Cell type</b>                    | <b>A7r5 SMC</b>                                | <b>HEK293</b>                                                    | <b>Neuron</b>                                 |
| <b>Location</b>                     | <b>Podosomes</b>                               | <b>Focal adhesions</b>                                           | <b>Synapses</b>                               |
| <b>Potential targeting proteins</b> | <b>PIX, PAK</b>                                | <b>FAK, Paxillin</b>                                             | <b>Grb4, CaMK, PIX</b>                        |
| <b>GIT1 phosphorylation site</b>    | <b>Y392</b>                                    | <b>Y321</b>                                                      | <b>Y392</b>                                   |
| <b>Signaling pathways</b>           | <p>Src<br/>↓<br/>pGIT1Y392<br/>↓<br/>pPLCγ</p> | <p>Src<br/>↓<br/>pGIT1Y321<br/>↓<br/>pMEK1<br/>↓<br/>pERK1/2</p> | <p>Src<br/>↓<br/>pGIT1Y392<br/>↓<br/>Grb4</p> |
| <b>Reference</b>                    | 1, 5-7                                         | 2, 8                                                             | 9, 10                                         |

#### REFERENCES:

1. Haendeler J, Yin G, Hojo Y, Saito Y, Melaragno M, Yan C, Sharma VK, Heller M, Aebersold R, Berk BC. GIT1 mediates Src-dependent activation of phospholipase Cgamma by angiotensin II and epidermal growth factor. *J Biol Chem.* 2003;278:49936-49944.
2. Yin G, Haendeler J, Yan C, Berk BC. GIT1 functions as a scaffold for MEK1-extracellular signal-regulated kinase 1 and 2 activation by angiotensin II and epidermal growth factor. *Mol Cell Biol.* 2004;24:875-885.
3. Pang J, Yan C, Natarajan K, Cavet ME, Massett MP, Yin G, Berk BC. GIT1 mediates HDAC5 activation by angiotensin II in vascular smooth muscle cells. *Arterioscler Thromb Vasc Biol.* 2008;28:892-898.
4. Nunes GL, Sgoutas DS, Redden RA, Sigman SR, Gravanis MB, King Iii SB, Berk BC. Combination of vitamins C and E alters the response to coronary balloon injury in the pig. *Arterioscler Thromb Vasc Biol.* 1995;15:156-165.
5. Hai CM, Hahne P, Harrington EO, Gimona M. Conventional protein kinase C mediates phorbol-dibutyrate-induced cytoskeletal remodeling in a7r5 smooth muscle cells. *Exp Cell Res.* 2002;280:64-74.

6. Webb BA, Eves R, Crawley SW, Zhou S, Cote GP, Mak AS. PAK1 induces podosome formation in A7r5 vascular smooth muscle cells in a PAK-interacting exchange factor-dependent manner. *Am J Physiol Cell Physiol.* 2005;289:C898-907.
7. Jones NP, Katan M. Role of phospholipase Cgamma1 in cell spreading requires association with a beta-Pix/GIT1-containing complex, leading to activation of Cdc42 and Rac1. *Mol Cell Biol.* 2007;27:5790-5805.
8. Yin G, Zheng Q, Yan C, Berk BC. GIT1 is a scaffold for ERK1/2 activation in focal adhesions. *J Biol Chem.* 2005;280:27705-27712.
9. Saneyoshi T, Wayman G, Fortin D, Davare M, Hoshi N, Nozaki N, Natsume T, Soderling TR. Activity-dependent synaptogenesis: regulation by a CaM-kinase kinase/CaM-kinase I/betaPIX signaling complex. *Neuron.* 2008;57:94-107.
10. Segura I, Essmann CL, Weinges S, Acker-Palmer A. Grb4 and GIT1 transduce ephrinB reverse signals modulating spine morphogenesis and synapse formation. *Nat Neurosci.* 2007;10:301-310.
